# Supplementary material for: Systematic Raman spectroscopic study of the complexation of uranyl with fluoride
Source: Royal Society of Chemistry journal article supplement (doi:10.1039/d4cp01569j), 2024-01-01
Supplement: d4cp01569j1.pdf [file d4cp01569j1.pdf]

*Supplementary Material for*

**Systematic Raman Spectroscopic Study of the Complexation of  
Uranyl with Fluoride**

Yating Yang<sup>1, a</sup>, Qian Liu<sup>1, a, \*</sup>, Youshi Lan<sup>1</sup>, Qianci Zhang<sup>1</sup>, Liyang Zhu<sup>1</sup>, Suliang  
Yang<sup>1</sup>, Guoxin Tian<sup>1</sup>, Xiaoyan Cao<sup>2, 3, \*</sup>, Michael Dolg<sup>2, 3, \*</sup>

<sup>1</sup>*Department of Radiochemistry, China Institute of Atomic Energy, Fangshan District,  
Beijing, China, 102413*

<sup>2</sup>*College of Chemistry, Beijing Normal University, Beijing, China, 1008753*

<sup>3</sup>*Institute of Theoretical Chemistry, University of Cologne, Greinstr. 4, 50939  
Cologne, Germany*

<sup>a</sup>equal contributions

# 1. Tables

**Table S1** Experimental results for the  $\text{UO}_2^{2+}$ - $(\text{CH}_3)_4\text{NF}$  system.  $I=2.5$  mol/L  $(\text{CH}_3)_4\text{NF}/(\text{CH}_3)_4\text{NNO}_3$

| $\text{C}(\text{F}^-)$<br>mol/L | $\text{C}(\text{UO}_2^{2+})$<br>mol/L | Curve fitting of normalized<br>Raman spectra of O=U=O<br>moiety                     | $[\text{UO}_2\text{F}_4^{2-}]$<br>mol/L | $[\text{UO}_2\text{F}_5^{3-}]$<br>mol/L | $[\text{F}^-]$<br>mol/L | $K_5$ | $\bar{K}_5$ |
|---------------------------------|---------------------------------------|-------------------------------------------------------------------------------------|-----------------------------------------|-----------------------------------------|-------------------------|-------|-------------|
| 0.82                            | 0.059                                 | 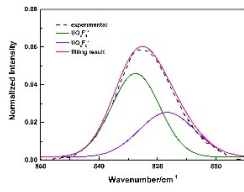   | 0.039                                   | 0.020                                   | 0.56                    | 0.93  |             |
| 1.14                            | 0.059                                 |    | 0.031                                   | 0.028                                   | 0.88                    | 1.0   |             |
| 1.63                            | 0.059                                 |   | 0.027                                   | 0.032                                   | 1.36                    | 0.86  | 0.92        |
| 1.90                            | 0.059                                 |  | 0.024                                   | 0.035                                   | 1.63                    | 0.88  |             |
| 2.37                            | 0.059                                 |  | 0.020                                   | 0.039                                   | 2.10                    | 0.91  |             |

**Table S2** U=O bond distances (Å) and  $\text{UO}_2^{2+}$  symmetric stretching frequencies (1/cm) by the COSMO approach at the B3LYP level and gasphase/COSMO approach at MP2 level calculations of  $[\text{UO}_2(\text{H}_2\text{O})_m\text{F}_n]^{2-n}$  complexes with  $\text{H}_2\text{O}$  directly coordinated to U.

| Complex                                                        | COSMO,<br>B3LYP |            | gasphase, MP2 |            | COSMO, MP2 <sup>a</sup> |            |
|----------------------------------------------------------------|-----------------|------------|---------------|------------|-------------------------|------------|
|                                                                | R(U=O)          | $\omega_e$ | R(U=O)        | $\omega_e$ | R(U=O)                  | $\omega_e$ |
| $[\text{UO}_2(\text{H}_2\text{O})_5]^{2+}$                     | 1.753           | 912        | 1.753         | 895        | 1.761                   | 881        |
| $[\text{UO}_2(\text{H}_2\text{O})_4\text{F}]^+$                | 1.770           | 877        | 1.774         | 861        | 1.777                   | 854        |
| $[\text{UO}_2(\text{H}_2\text{O})_3\text{F}_2]_{\text{meta}}$  | 1.785           | 847        | 1.783         | 845        | 1.789                   | 833        |
| $[\text{UO}_2(\text{H}_2\text{O})_2\text{F}_3]_{\text{ortho}}$ | 1.800           | 819        | 1.800         | 814        | 1.799                   | 815        |
| $[\text{UO}_2(\text{H}_2\text{O})\text{F}_3]^-$                | 1.801           | 824        | 1.799         | 817        | 1.799                   | 817        |
| $[\text{UO}_2\text{F}_4]^{2-}$                                 | 1.817           | 819        | 1.823         | 782        | 1.817                   | 795        |
| $[\text{UO}_2\text{F}_5]^{3-}$                                 | 1.830           | 769        | 1.834         | 756        | 1.826                   | 777        |

<sup>a</sup>MP2 calculations for the complexes  $[\text{UO}_2(\text{H}_2\text{O})_3\text{F}_2]_{\text{meta}}$ ,  $[\text{UO}_2(\text{H}_2\text{O})_2\text{F}_3]_{\text{ortho}}$ , and  $[\text{UO}_2(\text{H}_2\text{O})\text{F}_3]^-$ , were done using the Resolution-of-the-Identity approximation (RI-MP2). Auxiliary basis sets of def2-TZVPP quality for H, O, and F were used. For U the RI basis set (11s10p9d7f6g6h5i)/[11s10p9d7f6g6h5i] developed by B. Schimmelpfennig was applied. Test calculations have shown that the RI approximation changed the listed MP2 distances and frequencies by at most 0.002 Å and 1  $\text{cm}^{-1}$ , respectively.

**Table S3**  $\text{UO}_2^{2+}$  symmetric stretching frequencies (1/cm) from B3LYP COSMO calculations of  $[\text{UO}_2(\text{H}_2\text{O})_m\text{F}_n]^{2-n}(\text{H}_2\text{O})_k$  complexes in comparison to Raman data for aqueous solution. The additional k  $\text{H}_2\text{O}$  molecules form hydrogen bridges to the F<sup>-</sup> ligands.

| complex                                                                              | B3LYP, COSMO | Raman |
|--------------------------------------------------------------------------------------|--------------|-------|
| $[\text{UO}_2(\text{H}_2\text{O})_5]^{2+}$                                           | 912          | 870   |
| $[\text{UO}_2(\text{H}_2\text{O})_4\text{F}]^+(\text{H}_2\text{O})$                  | 880          | 858   |
| $[\text{UO}_2(\text{H}_2\text{O})_4\text{F}]^+(\text{H}_2\text{O})_2$                | 878          | 858   |
| $[\text{UO}_2(\text{H}_2\text{O})_3\text{F}_2](\text{H}_2\text{O})_3_{\text{ortho}}$ | 861          | 848   |
| $[\text{UO}_2(\text{H}_2\text{O})_3\text{F}_2](\text{H}_2\text{O})_4_{\text{meta}}$  | 859          | 848   |
| $[\text{UO}_2(\text{H}_2\text{O})\text{F}_3]-(\text{H}_2\text{O})_4$                 | 845          | 837   |
| $[\text{UO}_2\text{F}_4]^{2-}(\text{H}_2\text{O})_4$                                 | 830          | 828   |
| $[\text{UO}_2\text{F}_5]^{3-}(\text{H}_2\text{O})_5$                                 | 817          | 817*  |

\*extrapolated Raman value

**Table S4** Bond distances (Å) and  $\text{UO}_2^{2+}$  stretching frequencies (1/cm) using the COSMO approach in MP2 level calculations of  $[\text{UO}_2(\text{H}_2\text{O})_m\text{F}_n]^{2-n}(\text{H}_2\text{O})_k$  complexes in comparison to Raman data for aqueous solution. The additional explicitly treated  $k$   $\text{H}_2\text{O}$  molecules form hydrogen bridges to the  $\text{F}^-$  ligands<sup>a</sup>.

| complex                                                                     | R(U=O) | R(U-OH <sub>2</sub> ) | R(U-F) | $\omega_{sym}$ | $\omega_{asym}$ | Ref <sup>b</sup>                      |
|-----------------------------------------------------------------------------|--------|-----------------------|--------|----------------|-----------------|---------------------------------------|
| $[\text{UO}_2(\text{H}_2\text{O})_5]^{2+}$                                  | 1.761  | 2.420                 | -      | 881            | 954             | 1.76, 2.41, 870, 965                  |
| $[\text{UO}_2(\text{H}_2\text{O})_4\text{F}]^+(\text{H}_2\text{O})$         | 1.772  | 2.469                 | 2.177  | 860            | 942             | 858 <sup>c</sup>                      |
| $[\text{UO}_2(\text{H}_2\text{O})_4\text{F}]^+(\text{H}_2\text{O})_2$       | 1.770  | 2.469                 | 2.204  | 863            | 942             | 858 <sup>c</sup>                      |
| $[\text{UO}_2(\text{H}_2\text{O})_3\text{F}_2](\text{H}_2\text{O})_3$ ortho | 1.779  | 2.506                 | 2.226  | 848            | 927             | 848 <sup>c</sup>                      |
| $[\text{UO}_2(\text{H}_2\text{O})_3\text{F}_2](\text{H}_2\text{O})_4$ meta  | 1.778  | 2.492                 | 2.252  | 850            | 927             | 848 <sup>c</sup>                      |
| $[\text{UO}_2(\text{H}_2\text{O})\text{F}_3]-(\text{H}_2\text{O})_4$        | 1.786  | 2.476                 | 2.220  | 837            | 912             | 1.80, 2.47, 2.25, 837 <sup>c</sup>    |
| $[\text{UO}_2\text{F}_4]^{2-}(\text{H}_2\text{O})_4$                        | 1.798  | -                     | 2.231  | 819            | 890             | 828 <sup>c</sup>                      |
| $[\text{UO}_2\text{F}_5]^{3-}(\text{H}_2\text{O})_5$                        | 1.797  | -                     | 2.232  | 818            | 892             | 1.80, 2.26, 784, 850 817 <sup>c</sup> |

<sup>a</sup>Except for the complexes  $[\text{UO}_2(\text{H}_2\text{O})_5]^{2+}$  and  $[\text{UO}_2\text{F}_4]^{2-}(\text{H}_2\text{O})_4$ , the MP2 calculations were done using the Resolution-of-the-Identity approximation (RI-MP2). Auxiliary basis sets of def2-TZVPP quality for H, O, and F were used. For U the RI basis set (11s10p9d7f6g6h5i)/[11s10p9d7f6g6h5i] developed by B. Schimmelpfennig was applied. Test calculations have shown that the RI approximation changed the listed MP2 distances and frequencies by at most 0.002 Å and 1  $\text{cm}^{-1}$ , respectively.

<sup>b</sup>EXAFS data from ref. 21, except as otherwise indicated.

<sup>c</sup>present work

**Table S5:** Cartesian coordinates and total energies of the optimized B3LYP equilibrium structures of selected complexes  $[\text{UO}_2(\text{H}_2\text{O})_m\text{F}_n]^{2-n}(\text{H}_2\text{O})_k$  in aqueous solutions modeled by COSMO as implemented in TURBOMOLE are listed below. Only those complexes are listed where all water molecules in the second coordination sphere form hydrogen bonds to the fluoride ions in the first coordination sphere, since for these cases the effects on the vibrational modes of uranyl were found to be strongest. Basis sets of def2-TZVPP quality for H, O, and F were used. For U the ECP60MWB PP and the corresponding (14s13p10d8f6g)/[10s9p5d4f3g] basis set were applied. The coordinates are given in Bohr in TURBOMOLE format. Fine grids (5 or higher/better in TURBOMOLE) and total energy convergence to at least  $10^{-8}$  Hartree were required to get all real vibrational frequencies.

(1)  $[\text{UO}_2(\text{H}_2\text{O})_5]^{2+}$  E=-1009.848935139 Hartree

\$coord

|                   |                   |                   |   |
|-------------------|-------------------|-------------------|---|
| 0.09723598046692  | 0.04918232103920  | 0.00253555461392  | u |
| 0.10789131351419  | 0.12457655038580  | 3.31384762518114  | o |
| 0.08763564076838  | 0.11691148491801  | -3.30864387763171 | o |
| 2.96676730634930  | 3.62062474289100  | -0.01522871654925 | o |
| 3.59263200924106  | 4.50688135117062  | 1.45028061880683  | h |
| 3.56726481570991  | 4.51795453057196  | -1.48467274458099 | h |
| 0.01810500697277  | -4.64472305258075 | 0.06618023425767  | o |
| 1.47619380960052  | -5.66345547712244 | -0.33085613182268 | h |
| -1.46843451805638 | -5.62051826110330 | -0.33326403569031 | h |
| -4.19817555946266 | -1.65821677630119 | 0.00781397000687  | o |
| -5.26278550833863 | -1.78623193909081 | 1.48372352798875  | h |
| -5.30195731567002 | -1.70512849209736 | -1.44424970546794 | h |
| -2.65287334701367 | 3.71443640525791  | 0.01057147886562  | o |
| -3.30881071954280 | 4.56828784778360  | 1.48214412729160  | h |
| -3.29960141299260 | 4.58938170403743  | -1.45268660123937 | h |
| 4.33107022264565  | -1.80296267799195 | -0.01057444168427 | o |
| 5.39549315759775  | -1.96120039642819 | 1.46256291501200  | h |
| 5.42950435286281  | -1.88203595267902 | -1.46538514630950 | h |

\$end

(2)  $[\text{UO}_2(\text{H}_2\text{O})_4\text{F}]^+$  E=-1033.463673271 Hartree

\$coord

|                   |                   |                   |   |
|-------------------|-------------------|-------------------|---|
| -0.03417975167756 | 0.25522887059082  | 0.17643852989208  | u |
| -0.80467841063537 | -0.05597052574963 | 3.41652055049213  | o |
| 0.44008189052169  | 0.73112493510607  | -3.10004966317430 | o |
| 1.58609044919904  | 4.56843854454443  | 1.01981433082444  | o |
| 2.02677239413189  | 5.13457092222925  | 2.69561715989950  | h |
| 2.69755489373411  | 5.44425985141999  | -0.12956997342942 | h |
| 0.90424567928150  | -4.39697207375719 | -0.13267624093065 | o |
| 2.62679067650329  | -4.93274606697958 | -0.38849355645054 | h |
| -0.17053214965180 | -5.55016728933548 | -1.04575810298950 | h |

|                   |                   |                   |   |
|-------------------|-------------------|-------------------|---|
| -3.81182932349778 | -2.39780061770551 | -0.89268397935349 | o |
| -5.08793754067515 | -2.84477931199942 | 0.32998090396181  | h |
| -4.65296415187611 | -2.31592927613976 | -2.50803905399425 | h |
| -3.70980393687964 | 3.17504727995737  | -0.17852758040236 | o |
| -4.59536473166362 | 3.88052668758343  | 1.24923770962313  | h |
| -3.98489586236455 | 4.31046654605975  | -1.57712442642762 | h |
| 3.88884758983673  | -0.41501028904694 | 0.82764315415903  | f |

\$end

**(3) [UO<sub>2</sub>(H<sub>2</sub>O)<sub>3</sub>F<sub>2</sub>]<sub>meta</sub> E=-1057.068154422 Hartree**

\$coord

|                   |                   |                   |   |
|-------------------|-------------------|-------------------|---|
| -0.09792769770668 | -0.00505903194197 | -0.00601620413523 | u |
| 0.01018025758204  | -0.01353747277688 | 3.36510777433263  | o |
| -0.06581067937758 | 0.00336462443628  | -3.37891907958437 | o |
| 3.98943062704485  | -2.62114241549433 | -0.08962542048149 | o |
| 5.23608336669592  | -2.41333880873257 | 1.22364371358298  | h |
| 3.70684716943902  | -4.41743286944936 | -0.22749529245106 | h |
| -4.87796937874068 | -0.00020065990547 | 0.09571622883854  | o |
| -5.76080179070513 | 1.48458972059009  | -0.48431428510381 | h |
| -5.78086049166917 | -1.43854620707006 | -0.56490893375622 | h |
| -1.27931606211051 | 3.92420132347378  | 0.04153885873812  | f |
| 3.97449035009193  | 2.63933343338812  | 0.00472110476867  | o |
| 3.66599358071730  | 4.43192728955455  | 0.13436579280324  | h |
| 5.21261239429254  | 2.44202763711353  | -1.31815969545072 | h |
| -1.27412984879095 | -3.93397214432767 | -0.03977078448849 | f |

\$end

**(4) [UO<sub>2</sub>(H<sub>2</sub>O)<sub>3</sub>F<sub>2</sub>]<sub>ortho</sub> E=-1057.067838170 Hartree**

\$coord

|                   |                   |                   |   |
|-------------------|-------------------|-------------------|---|
| -0.03263641579030 | -0.37184340040329 | 0.02328480218256  | u |
| -0.11167191919621 | -0.26278241304311 | 3.39493176507299  | o |
| 0.01116155497543  | -0.14502164710999 | -3.34312083014446 | o |
| 4.24308211230402  | 1.95652138903108  | 0.20133928186461  | o |
| 5.64317686035006  | 0.89931211330904  | -0.29223295706762 | h |
| 4.49030966616950  | 3.56464765759219  | -0.61679460136664 | h |
| -2.47431003461804 | -3.64867234334868 | -0.07457211596614 | f |
| -4.70571943006021 | 0.99237026999897  | -0.10261366266030 | o |
| -5.27091696273652 | 2.51385413705698  | 0.72337996747570  | h |
| -5.86369544737101 | -0.32793877537568 | 0.38449313317063  | h |
| -0.55262779706413 | 4.39792502319420  | 0.10032452164259  | o |
| -0.48206521876510 | 5.47090762354356  | 1.56990522302029  | h |
| -0.82827249733623 | 5.48678092565788  | -1.33295163297888 | h |
| 3.06147321219162  | -3.04423377360343 | 0.03200651579147  | f |

Send

**(5) [UO<sub>2</sub>H<sub>2</sub>OF<sub>3</sub>]-H<sub>2</sub>O E= -1080.666960775 Hartree**

Scoord

|                   |                   |                   |   |
|-------------------|-------------------|-------------------|---|
| 0.43023951564143  | -0.15186906697449 | -0.19581302312970 | u |
| 1.52533594394453  | 0.38649670142831  | -3.36238487726690 | o |
| -0.77361900371743 | -0.57975820871801 | 2.94864441366919  | o |
| 3.70242918743541  | -2.47475976552356 | 0.64058169950525  | f |
| -3.20029167905520 | 2.80493680614876  | -1.13281422668951 | o |
| -4.70245448267857 | 2.70396056688617  | -0.10796680216689 | h |
| -2.64436265436441 | 4.59415808055261  | -1.09616674602476 | h |
| -2.00328273152561 | -3.17466282828057 | -1.52940143259465 | f |
| -0.88766198648494 | 7.27553472547316  | -0.59222462031085 | o |
| 0.58240698172952  | 6.31688810783711  | -0.02174933253365 | h |
| -0.35890587961981 | 8.17401106490811  | -2.08415562888849 | h |
| 2.17946585395774  | 3.49156819581374  | 0.95134551495601  | f |

Send

**(6) [UO<sub>2</sub>(H<sub>2</sub>O)<sub>2</sub>F<sub>3</sub>]- E= -1080.661652465 Hartree**

Scoord

|                   |                   |                   |   |
|-------------------|-------------------|-------------------|---|
| -0.00223450834213 | 0.12231106662014  | 0.00146839194113  | u |
| -0.05880664988229 | 0.15068489898947  | -3.40001455607087 | o |
| 0.05462990700332  | 0.16975769469960  | 3.40268393503108  | o |
| 4.56982284701302  | 1.95673302366591  | -0.12910551032960 | o |
| 5.83693776453077  | 0.88813859260613  | 0.62532883453760  | h |
| 4.73881733704347  | 3.59890102541215  | 0.64010160619718  | h |
| -4.58268282577875 | 1.93783569917888  | 0.12463808741147  | o |
| -4.70052649027251 | 3.60949778801019  | -0.58890025748318 | h |
| -5.86281699663903 | 0.92737146143598  | -0.68558894082221 | h |
| -2.80751351580112 | -2.94396231007219 | 0.03375032858503  | f |
| 2.83914372918718  | -2.91449497729199 | -0.01560048665055 | f |
| -0.02474036244533 | 4.31525489543776  | -0.00875765289618 | f |

Send

**(7) [UO<sub>2</sub>(H<sub>2</sub>O)F<sub>3</sub>]- E= -1004.158892453 Hartree**

Scoord

|                   |                   |                   |   |
|-------------------|-------------------|-------------------|---|
| 0.42639613973412  | -0.04521807171379 | -0.16171871374948 | u |
| 1.45421472988486  | 0.74039118146324  | -3.30878004097510 | o |
| -0.81379743946458 | -0.67615573622923 | 2.94329682901015  | o |
| 3.71018458500080  | -2.42642992263419 | 0.49073519727036  | f |
| -3.38317096705218 | 2.68444675423768  | -0.91791905324132 | o |
| -4.35103196979772 | 3.39338005309819  | 0.49106884315197  | h |
| -3.37988563700167 | 3.99384664523421  | -2.22541785864204 | h |
| -1.78632361414668 | -3.16855062778924 | -1.67365832567716 | f |
| 2.30019141643116  | 3.32108080119441  | 1.28189031906620  | f |

Send

**(8) [UO<sub>2</sub>F<sub>4</sub>]<sup>2-</sup> E= -1027.768185139 Hartree**

\$coord

|                   |                   |                   |   |
|-------------------|-------------------|-------------------|---|
| -0.48151331297536 | 0.55458620168436  | -0.27169995534497 | u |
| -1.27258341400711 | -0.29129250847092 | 2.96011764216251  | o |
| 0.30966158010447  | 1.40057360470798  | -3.50353774198257 | o |
| 1.03649744345223  | 4.20725381010496  | 1.05560095286496  | f |
| -1.99948396649125 | -3.09805557741490 | -1.59925637463359 | f |
| -4.24603437244238 | 2.28959910634275  | -0.73773533686870 | f |
| 3.28314618163075  | -1.18044640072717 | 0.19413295284029  | f |

Send

**(9) [UO<sub>2</sub>F<sub>5</sub>]<sup>3-</sup> E=-1127.797406182 Hartree**

\$coord

|                   |                   |                   |   |
|-------------------|-------------------|-------------------|---|
| 0.00013306133062  | -0.00038218879070 | 0.00000384943373  | u |
| 0.00071254936890  | -0.00115662879319 | 3.45882830294146  | o |
| 0.00053447422831  | -0.00129632349816 | -3.45883727728722 | o |
| 3.96146506286785  | -1.68384246834872 | -0.00018476824787 | f |
| -4.19430180513822 | -0.96452947126781 | 0.00018351223591  | f |
| -2.21353420825312 | 3.69044931512668  | -0.00003623109475 | f |
| 2.82432014246391  | 3.24700695866812  | -0.00009113339459 | f |
| -0.37837874466512 | -4.28760412667401 | 0.00012051733103  | f |

Send

**(10) [UO<sub>2</sub>(H<sub>2</sub>O)<sub>4</sub>F]<sup>+</sup>(H<sub>2</sub>O) E=-1109.951012513 Hartree**

\$coord

|                   |                   |                   |   |
|-------------------|-------------------|-------------------|---|
| -0.42662983759966 | 0.00768881570141  | 0.03088133752573  | u |
| -0.58881681181419 | -0.04519125349342 | 3.36859476313795  | o |
| -0.56515229108594 | 0.04364790805404  | -3.30793242191758 | o |
| -2.59617323499290 | 4.12572238664177  | 0.08168073596549  | o |
| -2.77860317878305 | 5.15780680410993  | 1.57300191938779  | h |
| -2.69912163725832 | 5.24859505875046  | -1.35024141757524 | h |
| 3.40477348087051  | -2.68731793670177 | 0.01060107486074  | o |
| 5.06405644802590  | -1.80119613542591 | -0.02691863882611 | h |
| 3.52621022253750  | -4.13794360843948 | -1.08321670378348 | h |
| -1.28728626664432 | -4.71820408670427 | -0.03609416187401 | o |
| -0.61881728682318 | -5.81285932007576 | 1.25994268933880  | h |
| -3.02881223114732 | -5.20903594907033 | -0.26731545724461 | h |
| -5.05478454520629 | -0.97791408321382 | -0.12098654252736 | o |
| -6.14858833536931 | -0.90795557832614 | 1.33593070554974  | h |
| -6.10139749410486 | -0.62832334141203 | -1.57231514382034 | h |



|                  |                  |                   |   |
|------------------|------------------|-------------------|---|
| 2.75818561065894 | 2.55055275109983 | 0.11223720716852  | f |
| 7.45688522119458 | 0.25075717330051 | 0.14393051171268  | o |
| 8.54940619701963 | 0.27629147373212 | -1.31333132834868 | h |
| 6.37983605010644 | 1.72540044204574 | -0.01252559385585 | h |

\$end

**(11) [UO<sub>2</sub>(H<sub>2</sub>O)<sub>4</sub>F]<sup>+</sup>(H<sub>2</sub>O)<sub>2</sub> E=-1186.438841571 Hartree**

\$coord

|                   |                   |                   |   |
|-------------------|-------------------|-------------------|---|
| -0.45608633278510 | -0.01237817462606 | 0.06590219276724  | u |
| -0.25367912983203 | -0.37567685197765 | 3.37961575551222  | o |
| -0.87288468480612 | 0.38168283523422  | -3.22456528571842 | o |
| 1.31229346591465  | 4.29548690464304  | 0.44736647098403  | o |
| 3.14757431549306  | 4.50808678639783  | 0.09340533975450  | h |
| 0.44229692785358  | 5.77444779776609  | -0.15921832982759 | h |
| 0.06613025885971  | -4.61578860279400 | -0.44907762000892 | o |
| 1.79632218329377  | -5.24878868145583 | -0.04217586109835 | h |
| -0.45456444081376 | -5.43510863537130 | -1.99098879549907 | h |
| -4.61240468854866 | -2.39414300348054 | 0.14885614921605  | o |
| -4.69127886773443 | -4.02509437447524 | 0.95979972588491  | h |
| -6.14941403907881 | -1.51977897801432 | 0.59254952668911  | h |
| -4.01386793523933 | 2.97693560303134  | 0.63610308372968  | o |
| -4.58831925492763 | 3.67231218766467  | 2.22041608843221  | h |
| -4.91163218937219 | 3.85461977916007  | -0.68556666559520 | h |
| 3.63102668454317  | -0.47572488687750 | -0.29005638504317 | f |
| 4.79720980798103  | -5.54182293987184 | 0.80954490020483  | o |
| 5.79966537602358  | -6.62844872075133 | -0.25472566869497 | h |
| 5.31434690506701  | -3.83117488313382 | 0.40930311050559  | h |
| 6.20851156781745  | 4.11939194383364  | -0.56227422819232 | o |
| 7.33889776281859  | 4.62178319294037  | 0.77496870081574  | h |
| 6.15045417091159  | 2.28892632474589  | -0.50340349168342 | h |

\$end

**(12) [UO<sub>2</sub>(H<sub>2</sub>O)<sub>3</sub>F<sub>2</sub>](H<sub>2</sub>O)<sub>3</sub> E=-1286.525913833Hartree**

\$coord

|                   |                   |                   |   |
|-------------------|-------------------|-------------------|---|
| 0.01549563024380  | -0.44794901083072 | 0.08264880398733  | u |
| -0.05016531204313 | -0.61315944436688 | -3.27215100995915 | o |
| 0.08252824325392  | -0.56048110976126 | 3.43949691599722  | o |
| -2.70635536485505 | 2.73330242167546  | 0.10996705499993  | f |
| 0.00962613956437  | 7.36611865252715  | 0.43306064776157  | o |
| -1.40617906335679 | 6.20980897313125  | 0.37418679161094  | h |
| -7.62346158126585 | 1.56235473396092  | -0.75653058906727 | o |
| -6.09349772153701 | 2.57826839823802  | -0.65254565527166 | h |
| 6.13066865091409  | 2.60331862979207  | -0.63431113001291 | h |

|                   |                   |                   |   |
|-------------------|-------------------|-------------------|---|
| 1.42568028970679  | 6.21578180586725  | 0.30457210617681  | h |
| -4.41291281335999 | -2.24599726597755 | 0.26263201212480  | o |
| -5.80969923855365 | -1.11295184512377 | -0.23747619485581 | h |
| -4.76486186590045 | -3.90016065983256 | -0.40751874004236 | h |
| -8.23928428298090 | 1.76003591481217  | -2.45830128962741 | h |
| 0.00747439808007  | -5.22588238795235 | 0.00970766813254  | o |
| 0.11027832768126  | -6.32201907957639 | 1.46072603214666  | h |
| -0.01092836039125 | -6.29904532322348 | -1.46163536491084 | h |
| 4.44734894196666  | -2.24692935192539 | 0.09708367883961  | o |
| 5.84470786984298  | -1.09045153208987 | -0.34853593571882 | h |
| 4.79461029099925  | -3.86195930417656 | -0.66440404903830 | h |
| 7.60718753240924  | 1.57517467594909  | -1.01776534757224 | o |
| 8.84874545225515  | 1.99500155132626  | 0.24595123463544  | h |
| 2.72545063162841  | 2.74268514555105  | 0.00849837343241  | f |

\$end

**(13) [UO<sub>2</sub>(H<sub>2</sub>O)<sub>3</sub>F<sub>2</sub>](H<sub>2</sub>O)<sub>4</sub> E=-1363.019120740Hartree**

\$coord

|                   |                   |                   |   |
|-------------------|-------------------|-------------------|---|
| 0.01612126409775  | -0.32123986907938 | 0.05048836134474  | u |
| 0.17387807511565  | -0.87304841668858 | 3.35963301589231  | o |
| -0.12446597626472 | 0.10847232407541  | -3.27702054861789 | o |
| 4.05502940330389  | 0.94982018474166  | 0.07422281580721  | f |
| -4.04121561129539 | 0.84539375654565  | 0.35865960596970  | f |
| 4.58755711255545  | 6.01807811799152  | -0.74789671329991 | o |
| 5.01889996814045  | 4.24818256859532  | -0.49726546697145 | h |
| -7.43458272270242 | -2.99855828811269 | 0.11723261300080  | o |
| -6.78031826890451 | -1.28087996601033 | 0.19050818564917  | h |
| 7.37532885973584  | -2.93401890189244 | 0.52335241065778  | o |
| 6.75147756927617  | -1.20926592137479 | 0.37669765691119  | h |
| -4.76256302123276 | 5.91287609578050  | -0.34552491133358 | o |
| -5.12608339023512 | 4.12972761674219  | -0.08164381597040 | h |
| -0.01286669190510 | 4.31111652553068  | 0.76908946044687  | o |
| -1.56144589152204 | 5.25234452002378  | 0.35730150875543  | h |
| 1.47332030592976  | 5.28731771097533  | 0.22866018002737  | h |
| -5.64878862429880 | 6.79893477028964  | 0.97495318546301  | h |
| 5.55971873854706  | 6.94334943213140  | 0.48190325538558  | h |
| 2.62015834462266  | -4.28262885112078 | -0.56438648290686 | o |
| 4.45980230258253  | -4.07801462590031 | -0.27712488054104 | h |
| 2.42796820481163  | -5.23178317633826 | -2.10642142868207 | h |
| 8.63613775607467  | -3.12075507590500 | -0.77687135100974 | h |
| -2.57697751236363 | -4.30044621173909 | -0.48441972956894 | o |
| -4.43183526152718 | -4.12110775361485 | -0.31291253735624 | h |
| -2.08740121078503 | -5.78945546237862 | 0.44111334768820  | h |
| -8.49225111917962 | -3.06795092430119 | -1.36310547245554 | h |

Send

**(14) [UO<sub>2</sub>(H<sub>2</sub>O)F<sub>3</sub>](H<sub>2</sub>O)<sub>4</sub> E=-1310.1168338980 Hartree**

Scored

|                   |                   |                   |   |
|-------------------|-------------------|-------------------|---|
| 0.84476337087286  | 0.14603629569650  | -0.33284970921661 | u |
| 1.44490436581275  | 0.01295469383694  | -3.65317509181320 | o |
| 0.20005782331632  | 0.31348537152208  | 2.97625651292238  | o |
| 4.16862326904630  | -2.25795223987933 | 0.39876679822884  | f |
| 7.93448831609755  | 1.75117578189078  | 0.95490655037573  | o |
| 7.13725320370325  | 0.10812773279130  | 0.86667794242565  | h |
| -5.29168907626829 | -1.84702878215096 | -0.04750828541425 | h |
| 0.10658662483638  | -6.23324141084658 | -0.05688033050903 | h |
| 6.55472307369165  | 2.91410914419340  | 0.66396659360900  | h |
| -2.89377629095899 | 2.86409930900150  | -1.14362982231370 | o |
| -4.47499757804984 | 2.07419937445975  | -0.56625092367378 | h |
| -2.71505078638525 | 4.56151967689637  | -0.40298979271275 | h |
| -6.56531051576972 | -0.52506170426006 | 0.00594972233568  | o |
| 1.63782118636399  | -7.16751241277579 | 0.29371656826412  | o |
| 2.91342909781759  | -5.86494375887904 | 0.43308805224986  | h |
| -7.30067511402927 | -0.61698577399189 | 1.66861590829239  | h |
| -1.90552505015595 | -2.99632802709287 | -0.65192254041330 | f |
| -1.06462384847108 | 7.25157179268633  | 0.79393087245089  | o |
| 0.62267523873066  | 6.56284915114127  | 0.56548336550987  | h |
| -1.15060740763077 | 8.70385342592622  | -0.30085623268630 | h |
| 2.88033042770124  | 3.79621805670138  | -0.05959116641714 | f |

Send

**(15) [UO<sub>2</sub>F<sub>4</sub>]<sup>2-</sup>(H<sub>2</sub>O)<sub>4</sub> E=-1333.706427662 Hartree**

Scored

|                   |                   |                   |   |
|-------------------|-------------------|-------------------|---|
| -0.32224767683968 | 0.69108366939790  | -0.45110843535336 | u |
| 0.58812057428963  | 0.70271559201432  | 2.81823980365896  | o |
| -1.23237818898067 | 0.67982792699492  | -3.72049530657687 | o |
| 2.68175865518900  | -2.16189723756575 | -1.28274478384959 | f |
| -3.06761078411152 | -2.42484283293991 | 0.33182663437331  | f |
| -3.32779881109062 | 3.54293855431566  | 0.37970784111896  | f |
| 2.42290200118443  | 3.80736479045596  | -1.23333597304040 | f |
| 0.01531030583969  | -6.77701345683342 | -0.49833634901504 | o |
| -1.41209958671966 | -5.69745541040916 | -0.11123293278201 | h |
| 1.33101085284258  | -5.55983478812581 | -0.87466690362505 | h |
| -0.67900604866984 | 8.15686417383894  | -0.45020281049645 | o |
| 0.75225511860768  | 7.07964237938210  | -0.82933500303675 | h |
| -1.98781295647059 | 6.93802303302272  | -0.05539145437713 | h |
| 6.64255803349010  | 1.02836852551444  | -3.10443370058684 | o |
| 5.53504372493804  | 2.39869385405577  | -2.60448779733246 | h |

|                   |                   |                   |   |
|-------------------|-------------------|-------------------|---|
| 5.66572660501125  | -0.44956433064311 | -2.64112286863794 | h |
| -7.28378500697294 | 0.35366636319341  | 2.20955762991267  | o |
| -6.31093536366276 | 1.83081497771103  | 1.73534994591898  | h |
| -6.17419157358271 | -1.01723379167854 | 1.71587105550266  | h |

\$end

**(16) [UO<sub>2</sub>F<sub>5</sub>]<sup>3-</sup>(H<sub>2</sub>O)<sub>5</sub> E=-1510.244667967Hartree**

\$coord

|                   |                   |                   |   |
|-------------------|-------------------|-------------------|---|
| 0.03460777805748  | 0.15143249114421  | 0.52034393247473  | u |
| 0.00474201240534  | 0.09166447977219  | 3.92486423043231  | o |
| 0.06454488469833  | 0.21175234549383  | -2.88354710076355 | o |
| 3.66661634510442  | -2.30039407337936 | 0.50860896287908  | f |
| -4.34522144643497 | 0.00167559293602  | 0.48831983492755  | f |
| -1.46088395691794 | 4.26980558250154  | 0.57878514983040  | f |
| 3.48931196827579  | 2.84678882369353  | 0.59751946640225  | f |
| -1.17534170673697 | -4.05851972742819 | 0.43422988284653  | f |
| 7.95887016342653  | 0.43598813396970  | 0.07243687437312  | o |
| 6.70897848916599  | 1.77929636759636  | 0.22213882714484  | h |
| 6.81132826974627  | -0.99966134723362 | 0.17268412395550  | h |
| -6.52747260800105 | 4.59468242421186  | 0.02459555909935  | o |
| -4.75777685679197 | 5.07617451187885  | 0.18161836054171  | h |
| -6.31148408722223 | 2.76986739824388  | 0.13543102331996  | h |
| -6.20977479279953 | -4.70869804524412 | -0.13681366921818 | o |
| -6.11484808896305 | -2.87836369249097 | 0.03735095565368  | h |
| -4.41197091310657 | -5.07723019685094 | 0.00485644386211  | h |
| 2.73635769208164  | -7.30346607134903 | 0.93271619951863  | o |
| 3.63315546626633  | -5.69893593458257 | 0.83201140920667  | h |
| 1.02055123511735  | -6.65204501070247 | 0.79125366811077  | h |
| 2.21927276811831  | 7.75626359303061  | 1.19354386974761  | o |
| 3.22548136027052  | 6.22251491739862  | 1.03879000356943  | h |
| 0.55278170158553  | 6.99167218858789  | 1.02995006620132  | h |

\$end

**Table S6:** Cartesian coordinates and total energies of optimized MP2/RIMP2 equilibrium structures of selected complexes  $[\text{UO}_2(\text{H}_2\text{O})_m\text{F}_n]^{2-n}(\text{H}_2\text{O})_k$  in aqueous solution modeled by COSMO as implemented in TURBOMOLE are listed below. Only those complexes are listed where all water molecules in the second coordination sphere form hydrogen bonds to the fluoride ions in the first coordination sphere, since for these cases the effects on the vibrational modes of uranyl were found to be strongest. Basis sets of def2-TZVPP quality for H, O, and F were used. For U the ECP60MWB PP and the corresponding (14s13p10d8f6g)/[10s9p5d4f3g] basis set, as well as the RI basis set (11s10p9d7f6g6h5i)/[11s10p9d7f6g6h5i] by B. Schimmelpfennig, were applied. All occupied orbitals with orbital energies below -3.0 Hartree were kept frozen in RIMP2. The coordinates are given in Bohr in TURBOMOLE format.

(1)  $[\text{UO}_2(\text{H}_2\text{O})_5]^{2+}$   $E_{\text{MP2}} = -1008.7164258472$  Hartree

\$coord

|                   |                   |                   |   |
|-------------------|-------------------|-------------------|---|
| 0.01070747024414  | 0.01434820717103  | 0.00241074520902  | u |
| 0.02315641235354  | 0.14558803731781  | 3.32820056533481  | o |
| 0.01342699537155  | 0.03472936089164  | -3.32614458621425 | o |
| 3.12885447075212  | 3.30307473724403  | -0.05614339126558 | o |
| 3.84131056750535  | 4.14393598958361  | 1.39316686896963  | h |
| 3.81420382962489  | 4.13886400914651  | -1.52142227929927 | h |
| -0.43281214550846 | -4.60745673348044 | 0.18598920425040  | o |
| 0.93433364294042  | -5.71971207614677 | -0.27016369873224 | h |
| -1.97621481886898 | -5.45002780601436 | -0.28566847022273 | h |
| -4.35933296426168 | -1.34647840574841 | 0.02933146966821  | o |
| -5.42647376258285 | -1.29644866424197 | 1.50542961746254  | h |
| -5.48217210437021 | -1.21443368779577 | -1.39995722808165 | h |
| -2.41283383238689 | 3.84362296884335  | -0.04497926022363 | o |
| -2.96177110107275 | 4.79416484957934  | 1.40768778733779  | h |
| -2.92476001567584 | 4.80096605496308  | -1.50673277983939 | h |
| 4.04080912379164  | -2.15900833379953 | 0.03912756838527  | o |
| 5.09282038880856  | -2.30755047697152 | 1.51947571825495  | h |
| 5.17510252922983  | -2.23339320701088 | -1.38532208443006 | h |

\$end

(2)  $[\text{UO}_2(\text{H}_2\text{O})_4\text{F}]^+$   $E_{\text{MP2}} = -1032.3086252331$  Hartree

\$coord

|                   |                   |                   |   |
|-------------------|-------------------|-------------------|---|
| -0.04899799916213 | 0.23290777184300  | 0.17073627015105  | u |
| -0.82981979834787 | -0.06375538734103 | 3.42372583206170  | o |
| 0.44851810772742  | 0.69530856480997  | -3.11872351387691 | o |
| 1.48234388610050  | 4.53606383504366  | 0.94442435629676  | o |
| 1.89968017144093  | 5.08719088541898  | 2.62917518478788  | h |
| 2.75463317328366  | 5.27363558401538  | -0.12998714534769 | h |
| 0.86886919595854  | -4.36028141753881 | -0.07381895275890 | o |

|                   |                   |                   |   |
|-------------------|-------------------|-------------------|---|
| 2.61360993943117  | -4.81279189703246 | -0.33056350173972 | h |
| -0.10841328858339 | -5.45111902684642 | -1.15431338129592 | h |
| -3.76988312414887 | -2.40089695235652 | -0.90161656340744 | o |
| -4.98040605869998 | -2.89729678026529 | 0.36517711145090  | h |
| -4.75170056802024 | -2.06951603427822 | -2.39931454518854 | h |
| -3.70640560218802 | 3.08621090282427  | -0.22140785233832 | o |
| -4.59110582998294 | 3.76205346577435  | 1.21860242258774  | h |
| -3.83489298176092 | 4.36019764066847  | -1.51534599625692 | h |
| 3.87216848865178  | -0.38762296703046 | 0.85558003652882  | f |

Send

**(3) [UO<sub>2</sub>(H<sub>2</sub>O)<sub>3</sub>F<sub>2</sub>]<sub>meta</sub> E<sub>RIMP2</sub>= -1054.8160938680 Hartree**

\$coord

|                   |                   |                   |   |
|-------------------|-------------------|-------------------|---|
| -0.06842061436643 | -0.00282048388532 | 0.00150379009898  | u |
| 0.05284070509707  | -0.01840915602090 | 3.38042223059159  | o |
| -0.04917213160433 | 0.01283860462821  | -3.38006968060786 | o |
| 3.94499530007062  | -2.57624464467143 | -0.13394299172377 | o |
| 5.15506489661879  | -2.39755782024502 | 1.21481052599669  | h |
| 3.57469014510541  | -4.35966933557734 | -0.19642482984495 | h |
| -4.77733952816150 | -0.00251897708462 | 0.14081671407738  | o |
| -5.61429403033857 | 1.47152577953663  | -0.52243155135732 | h |
| -5.63880182883498 | -1.43074615431999 | -0.58803569126158 | h |
| -1.27265529103185 | 3.91787144644641  | 0.05584030259067  | f |
| 3.93359024435951  | 2.59458829319774  | 0.03869061883228  | o |
| 3.55371410817237  | 4.37560218011095  | 0.11057053752523  | h |
| 5.12189903903284  | 2.42465138259185  | -1.33032183951428 | h |
| -1.25728921739242 | -3.92689669584776 | -0.03554435778472 | f |

Send

**(4) [UO<sub>2</sub>(H<sub>2</sub>O)<sub>3</sub>F<sub>2</sub>]<sub>ortho</sub> E<sub>RIMP2</sub>= -1054.8156909690 Hartree**

\$coord

|                   |                   |                   |   |
|-------------------|-------------------|-------------------|---|
| -0.03988972322323 | -0.31515982460877 | 0.02147288732956  | u |
| -0.13386188043817 | -0.20927901927059 | 3.39617730856525  | o |
| 0.01970690648036  | -0.08902860118610 | -3.34808136065191 | o |
| 4.20184530833239  | 1.96741187633974  | 0.24168876681440  | o |
| 5.54131598320785  | 0.82929712787820  | -0.23889668781867 | h |
| 4.49315642603126  | 3.49275382659250  | -0.70787395517294 | h |
| -2.47087765350415 | -3.61728674789644 | -0.09180316878178 | f |
| -4.67330420120606 | 1.00290724957231  | -0.14362309682927 | o |
| -5.25190646243778 | 2.44690666937906  | 0.80141269599536  | h |
| -5.75822983766950 | -0.37431894500997 | 0.35218528750748  | h |
| -0.56693071776242 | 4.38993633701167  | 0.10156843730035  | o |
| -0.42378437809168 | 5.47589831425046  | 1.55430152368602  | h |
| -0.86742059394401 | 5.48913447142096  | -1.31686143669718 | h |

3.05746850802067 -3.00734595250966 0.04571220861709 f  
Send

**(5) [UO<sub>2</sub>H<sub>2</sub>OF<sub>3</sub>]<sup>-</sup> H<sub>2</sub>O E<sub>RIMP2</sub>= -1078.3894623877 Hartree**

\$coord chem.pot.

|                   |                   |                   |   |
|-------------------|-------------------|-------------------|---|
| 0.40884819436009  | -0.09230068358855 | -0.16791667667633 | u |
| 1.50768378971330  | 0.68982273022673  | -3.27979451736856 | o |
| -0.81858656503316 | -0.74247028650501 | 2.92694845991265  | o |
| 3.75955672384092  | -2.34502888689596 | 0.56970596171321  | f |
| -3.26443635232640 | 2.78005331381609  | -1.00411409571477 | o |
| -4.65507946001230 | 2.78110895996798  | 0.17025400910927  | h |
| -2.67255694865650 | 4.55009240379527  | -1.09229491804943 | h |
| -1.98754020663774 | -3.04703448799492 | -1.73239494476365 | f |
| -0.82603072087995 | 7.17100000051389  | -0.79380823995278 | o |
| 0.54979137781397  | 6.17248753337834  | -0.06818316904860 | h |
| -0.15161534808130 | 7.88000236566663  | -2.32568458302405 | h |
| 1.99926458670042  | 3.56877139074274  | 1.21517765740992  | f |

Send

**(6) [UO<sub>2</sub>(H<sub>2</sub>O)<sub>2</sub>F<sub>3</sub>]<sup>-</sup> E<sub>RIMP2</sub>= -1078.3881254349 Hartree**

\$coord

|                   |                   |                   |   |
|-------------------|-------------------|-------------------|---|
| -0.00238365264440 | 0.15462737032267  | 0.00227486296652  | u |
| -0.07027770800423 | 0.18668814996997  | -3.39633227614235 | o |
| 0.06466115785484  | 0.20264585278429  | 3.40081542467283  | o |
| 4.51344488649230  | 1.94048713789837  | -0.16931997446716 | o |
| 5.73544587660661  | 0.85923807323440  | 0.63706653681606  | h |
| 4.66519241869333  | 3.56034845206253  | 0.64658939661342  | h |
| -4.52652198368711 | 1.92185075474832  | 0.16488075064164  | o |
| -4.62541019974013 | 3.56972527390419  | -0.60214334475818 | h |
| -5.75908513546394 | 0.89618492675728  | -0.69582599688330 | h |
| -2.80474398959660 | -2.92993349565629 | 0.03180043340529  | f |
| 2.83470810788877  | -2.90124797449137 | -0.01416634463019 | f |
| -0.02499954278261 | 4.35741433700937  | -0.00563568878317 | f |

Send

**(7) [UO<sub>2</sub>(H<sub>2</sub>O)F<sub>3</sub>]<sup>-</sup> E<sub>RIMP2</sub>= -1002.0419588744 Hartree**

\$coord

|                   |                   |                   |   |
|-------------------|-------------------|-------------------|---|
| 0.44710320452188  | -0.04771130137160 | -0.15518896401699 | u |
| 1.47712006207253  | 0.73541833467295  | -3.29949362075176 | o |
| -0.79075745167059 | -0.67528768107627 | 2.94889132207112  | o |
| 3.72702652821801  | -2.44332523930184 | 0.49519632391036  | f |
| -3.30776973353901 | 2.70300043720591  | -0.89187244461351 | o |
| -4.36779068120863 | 3.33046782403710  | 0.44779779872802  | h |
| -3.40653351394119 | 3.94715755452405  | -2.21654584473036 | h |
| -1.88396803534723 | -3.09346297583980 | -1.68889329791429 | f |
| 2.28234686483716  | 3.36053412353406  | 1.27960592371676  | f |

Send

**(8) [UO<sub>2</sub>F<sub>4</sub>]<sup>2-</sup> E= -1026.6659531105 Hartree**

\$coord

|                   |                   |                   |   |
|-------------------|-------------------|-------------------|---|
| -0.48154005103873 | 0.55433765996816  | -0.27156579189265 | u |
| -1.27142941356562 | -0.29263981219974 | 2.95980358060297  | o |
| 0.30837446186105  | 1.40127579847577  | -3.50296623631666 | o |
| 1.02795426521721  | 4.19620836731828  | 1.05212457935115  | f |
| -1.99114287770919 | -3.08743031114593 | -1.59543864003393 | f |
| -4.23580833244041 | 2.28014462044796  | -0.73715780445620 | f |
| 3.27296881857791  | -1.17093117916023 | 0.19404929842271  | f |

Send

**(9) [UO<sub>2</sub>F<sub>5</sub>]<sup>3-</sup> E= -1126.5567870050 Hartree**

\$coord

|                   |                   |                   |   |
|-------------------|-------------------|-------------------|---|
| 0.00009879661801  | -0.00019263851592 | 0.00000342449942  | u |
| 0.00026533526897  | -0.00003991954534 | 3.45136316160116  | o |
| -0.00003594078690 | -0.00019494032277 | -3.45136829578592 | o |
| 3.94339564945142  | -1.67698440021125 | 0.00051540467745  | f |
| -4.17564905381050 | -0.96144968798911 | -0.00027981307242 | f |
| -2.20447990005619 | 3.67417177396532  | 0.00078470959712  | f |
| 2.81342496134454  | 3.23194869347651  | -0.00099339571853 | f |
| -0.37606931582148 | -4.26861381444196 | -0.00003842388064 | f |

Send

**(10) [UO<sub>2</sub>(H<sub>2</sub>O)<sub>4</sub>F]<sup>+</sup>(H<sub>2</sub>O) E<sub>RIMP2</sub>= -1107.5814561390 Hartree**

\$coord

|                   |                   |                   |   |
|-------------------|-------------------|-------------------|---|
| -0.35323998134839 | -0.15068688292918 | 0.12432087002315  | u |
| -0.54863885577134 | -0.21847979803533 | 3.46671866903183  | o |
| -0.40744672349798 | -0.27633349125736 | -3.22211932377133 | o |
| -2.14420348232013 | 4.20483129041276  | -0.04352844082412 | o |
| -3.79975302124066 | 4.57209469319811  | 0.62072662874064  | h |
| -1.06006584921101 | 5.54983379645743  | 0.53638136397516  | h |
| 3.55383606940045  | -2.66878551297322 | 0.30545958318129  | o |
| 5.12806609130473  | -1.77337365589236 | -0.16727400812960 | h |
| 3.61849418933942  | -4.31260506514848 | -0.47305152239036 | h |
| -1.37295237196432 | -4.68159756999553 | 0.08076474482962  | o |
| -1.78544128970543 | -5.68724384537225 | 1.54201889678067  | h |
| -1.99154301025984 | -5.61339934452199 | -1.35665049856308 | h |
| -5.00454129543722 | -0.21743853171433 | 0.09159486547062  | o |
| -6.03475213234030 | -0.66293117606068 | 1.52632616784562  | h |
| -6.04425579151629 | -0.50877269002094 | -1.37540340626752 | h |
| 2.72922084773000  | 2.57289517474960  | 0.17039770423890  | f |



|                  |                  |                   |   |
|------------------|------------------|-------------------|---|
| 7.30753858828562 | 0.49007100504743 | -0.61962561116453 | o |
| 8.01286680684700 | 0.59551724329013 | -2.29253457539628 | h |
| 6.01119530715609 | 1.78880384429942 | -0.56359044242826 | h |

\$end

**(11) [UO<sub>2</sub>(H<sub>2</sub>O)<sub>4</sub>F]<sup>+</sup>(H<sub>2</sub>O)<sub>2</sub> E<sub>RIMP2</sub>= -1183.9276034897 Hartree**

\$coord

|                   |                   |                   |   |
|-------------------|-------------------|-------------------|---|
| 0.24743223788221  | 0.57642456232603  | 0.25971356517532  | u |
| -0.56587387562274 | -0.66862948389297 | 3.25632712150356  | o |
| 0.89655997603935  | 1.80706960926164  | -2.78287175538672 | o |
| 0.88922081172830  | 4.75768876441694  | 2.19806954751927  | o |
| 2.67026675485804  | 5.32969703918564  | 2.32936428791183  | h |
| -0.08529348521797 | 6.19181590759624  | 1.64502588437091  | h |
| 1.76513451675268  | -3.62597854241197 | -0.95331377896295 | o |
| 3.21008787929647  | -4.17249683008712 | 0.12074484812228  | h |
| 2.26427373240364  | -3.94562252013205 | -2.67627807201910 | h |
| -3.10356372076247 | -2.12102237959121 | -1.74038043185264 | o |
| -2.99040180016009 | -3.92110635596772 | -1.47846280332802 | h |
| -4.86033278039177 | -1.70086346270167 | -1.50067769072395 | h |
| -3.77958799191129 | 2.87144074655070  | 0.15998719543570  | o |
| -4.96713386932692 | 3.03985941639617  | 1.53116319658598  | h |
| -4.40740751521527 | 3.93011985003186  | -1.18297785046846 | h |
| 4.26467188975496  | 0.69312852556190  | 1.35001098887884  | f |
| 5.44115288023532  | -4.23978276935303 | 2.29971398099929  | o |
| 7.02586211128787  | -4.97324342706604 | 1.78944606302005  | h |
| 5.72200642441493  | -2.42821530741450 | 2.28073783080839  | h |
| 5.81644057675209  | 5.47742791294653  | 2.30939434999066  | o |
| 6.58830724143587  | 5.83420891315735  | 3.91736270543896  | h |
| 5.95986819267077  | 3.66016156954813  | 2.10551176264880  | h |

\$end

**(12) [UO<sub>2</sub>(H<sub>2</sub>O)<sub>3</sub>F<sub>2</sub>](H<sub>2</sub>O)<sub>3</sub> E<sub>RIMP2</sub>= -1283.8520627938 Hartree**

\$coord

|                   |                   |                   |   |
|-------------------|-------------------|-------------------|---|
| 0.01223681917922  | -0.38108228729092 | 0.08957551536839  | u |
| 0.03238504180587  | -0.74247505946470 | -3.25392112525154 | o |
| -0.00679975129596 | -0.27854883585594 | 3.44923279610318  | o |
| -2.70942134498986 | 2.81851745403848  | -0.13817632889331 | f |
| 0.00833994641272  | 6.97635282738738  | 1.66100858163159  | o |
| -1.39644331982618 | 5.91050351098367  | 1.18169987144435  | h |
| -7.41624404432714 | 1.56059418163455  | -1.32900183592922 | o |
| -5.85588771807882 | 2.52164456326807  | -1.14871109779116 | h |
| 5.85295463598797  | 2.50562136000955  | -1.22420097812992 | h |
| 1.40684988247947  | 5.90379864217067  | 1.17725235882641  | h |
| -4.38802294742882 | -2.14476058635191 | 0.27079169618814  | o |
| -5.71919660722380 | -1.05430547099609 | -0.44461495279004 | h |

|                   |                   |                   |   |
|-------------------|-------------------|-------------------|---|
| -4.68670536767998 | -3.81937616345154 | -0.37340112531259 | h |
| -7.84502029321214 | 1.67658255161052  | -3.09196864367307 | h |
| 0.02787796332747  | -5.09158328967397 | 0.32720711205370  | o |
| -0.00735970449752 | -6.10440424385484 | 1.83921243677230  | h |
| 0.03149791456075  | -6.26674201056639 | -1.06270943602466 | h |
| 4.42135736739748  | -2.11947383961696 | 0.32585593020129  | o |
| 5.73907818345819  | -1.05201475732697 | -0.44784573376043 | h |
| 4.71352185276614  | -3.81673680129667 | -0.25902447991562 | h |
| 7.29233618895604  | 1.47894411570718  | -1.73808836645058 | o |
| 8.69465545723331  | 2.11127818676211  | -0.76883433472718 | h |
| 2.73046664092693  | 2.82253054613180  | -0.12398185504376 | f |

Send

**(13) [UO<sub>2</sub>(H<sub>2</sub>O)<sub>3</sub>F<sub>2</sub>](H<sub>2</sub>O)<sub>4</sub> E<sub>RIMP2</sub>= -1360.2044184390 Hartree -7.52 cm<sup>-1</sup> was**

**obtained**

Scoord

|                   |                   |                   |   |
|-------------------|-------------------|-------------------|---|
| 0.02438172442310  | -0.30895471339889 | 0.06954278724524  | u |
| 0.18712866226709  | -1.01863653469217 | 3.35007820987024  | o |
| -0.11526636469331 | 0.30549865789480  | -3.23169713175375 | o |
| 4.08224085174461  | 0.96948247191905  | 0.16095707557111  | f |
| -4.04838467847174 | 0.85606117277977  | 0.45885406837959  | f |
| 4.44961503982530  | 5.90126434790323  | -0.86684058895810 | o |
| 4.87075694375870  | 4.13795045300503  | -0.55284082972086 | h |
| -7.31133492087145 | -2.96803723989196 | 0.31822118751086  | o |
| -6.60820267671845 | -1.26787296872950 | 0.37813507255405  | h |
| 7.20920935544232  | -2.93331236780169 | 0.68114986437285  | o |
| 6.56895972854360  | -1.21459747056057 | 0.51925672079106  | h |
| -4.62980558063691 | 5.78225555449354  | -0.51428828235472 | o |
| -4.97686490373652 | 4.00791630609281  | -0.17426332405685 | h |
| -0.00374555397767 | 4.26619168612561  | 1.00118459718913  | o |
| -1.53693793274929 | 5.16851767456196  | 0.46989586653795  | h |
| 1.45940885078821  | 5.20880161968245  | 0.35465154455738  | h |
| -5.65725585134433 | 6.69807384441020  | 0.67362999342799  | h |
| 5.54263040702797  | 6.84822243771936  | 0.23492779497383  | h |
| 2.56517225931809  | -4.21941706426740 | -0.69284729598156 | o |
| 4.38920809692559  | -4.03264332920380 | -0.31935897102764 | h |
| 2.47005507075626  | -4.99880951972400 | -2.33546620675444 | h |
| 8.55541267854296  | -3.05552618208951 | -0.53531635015012 | h |
| -2.54732489502490 | -4.20720663643441 | -0.68985450991647 | o |
| -4.38147567400377 | -4.05455485410177 | -0.36922888550160 | h |
| -2.00332986774839 | -5.72435747999429 | 0.15579962645921  | h |
| -8.47963331261852 | -2.95002784245187 | -1.07499338461767 | h |

Send

**(14) [UO<sub>2</sub>(H<sub>2</sub>O)F<sub>3</sub>](H<sub>2</sub>O)<sub>4</sub> E<sub>RIMP2</sub>= -1307.4188811686 Hartree**

\$coord

|                   |                   |                   |   |
|-------------------|-------------------|-------------------|---|
| 0.91574460272709  | 0.12482600959940  | -0.34048736891824 | u |
| 1.80868065358471  | -0.00295126298877 | -3.59240263612379 | o |
| -0.02565927108944 | 0.28976433212474  | 2.89656065336792  | o |
| 4.16274790465905  | -2.28988340791150 | 0.68750331844911  | f |
| 7.71669124849447  | 1.75592428227036  | 1.27148744323314  | o |
| 6.91892255551216  | 0.11479689707186  | 1.18934583430779  | h |
| -5.05576447250578 | -1.79426108149704 | -0.31470644697771 | h |
| 0.01366287967098  | -6.01089524421348 | -0.04497047567113 | h |
| 6.32999767064995  | 2.89354183168189  | 0.92819240673321  | h |
| -2.72923407783224 | 2.84049455348636  | -1.44779337749787 | o |
| -4.30644369245162 | 2.04072423086819  | -0.88135582723960 | h |
| -2.58300000275367 | 4.49742686210542  | -0.61780686109993 | h |
| -6.37006924154359 | -0.51115023151653 | -0.25324651893303 | o |
| 1.46405428664876  | -6.97935363387332 | 0.49683539016828  | o |
| 2.75073152773495  | -5.69803563706187 | 0.69469484333351  | h |
| -7.06268711098237 | -0.62857619276835 | 1.42354587020107  | h |
| -1.88549391826804 | -2.95591677891852 | -0.94069369135019 | f |
| -1.09142934244958 | 7.05947870624062  | 0.87789428637287  | o |
| 0.59736711645241  | 6.36026161654920  | 0.68540418497566  | h |
| -1.06802982141893 | 8.60366536817367  | -0.08188668042721 | h |
| 2.84760231729212  | 3.83659608967731  | 0.07998859103628  | f |

\$end

**(15) [UO<sub>2</sub>F<sub>4</sub>]<sup>2-</sup>(H<sub>2</sub>O)<sub>4</sub> E= -1332.1213709365 Hartree**

\$coord

|                   |                   |                   |   |
|-------------------|-------------------|-------------------|---|
| -0.23214961040154 | 0.69848787217735  | -0.13154155784012 | u |
| 0.50748591764007  | 0.62489540735595  | 3.18446346029548  | o |
| -0.97304983568184 | 0.76989949918749  | -3.44671589676580 | o |
| 2.78758048073973  | -2.14636576061663 | -0.88251324206397 | f |
| -3.02488874479793 | -2.40772048893113 | 0.42749549964488  | f |
| -3.25234909681200 | 3.54372022560126  | 0.60561222003454  | f |
| 2.55447877378154  | 3.81006955320518  | -0.70786148227365 | f |
| -0.12140549059730 | -6.54670067737145 | -1.09852825163245 | o |
| -1.49592924285623 | -5.47384317369685 | -0.54831506311238 | h |
| 1.25449177551944  | -5.34419978773475 | -1.16531454398111 | h |
| -0.79443289758628 | 7.87108602669863  | -1.17171708974762 | o |
| 0.69869249884761  | 6.81568544785440  | -1.17288574365793 | h |
| -2.05125747079128 | 6.69891195594567  | -0.54780453033008 | h |
| 6.37168708959330  | 1.04121506164217  | -3.09807867415753 | o |
| 5.33908981109393  | 2.39495953421038  | -2.43179639194565 | h |
| 5.44773963670411  | -0.42470519520117 | -2.51460243783438 | h |
| -7.09225893287091 | 0.36236701831625  | 2.34396572808855  | o |
| -6.09843757478553 | 1.82657080488157  | 1.88390063915869  | h |
| -5.98826721250966 | -0.99217133168862 | 1.80589594980653  | h |

Send

(16) [UO<sub>2</sub>F<sub>5</sub>]<sup>3-</sup>(H<sub>2</sub>O)<sub>5</sub> E<sub>RIMP2</sub>=-1507.2284447222 Hartree

Scoord

|                   |                   |                   |   |
|-------------------|-------------------|-------------------|---|
| -0.06515694653928 | 0.03723782973232  | -0.38398592659355 | u |
| 0.44226474534307  | 0.42954222632036  | 2.94749660423128  | o |
| -0.56992670327574 | -0.35375381714380 | -3.72061786592445 | o |
| 3.56006565489201  | -2.42897266521622 | -0.64676923914766 | f |
| -4.39432487800848 | -0.09843968920711 | 0.28070603043745  | f |
| -1.60929404650298 | 4.14289716157612  | -0.63019408747793 | f |
| 3.31897769144071  | 2.70600988485461  | -1.21808743482343 | f |
| -1.21440536689651 | -4.13924854148389 | 0.27608028373451  | f |
| 7.41348292339770  | 0.51174248875130  | 0.73758075442763  | o |
| 6.22283855888736  | 1.77065406846459  | 0.12003578325479  | h |
| 6.35230070208467  | -0.95791522811318 | 0.42471066737664  | h |
| -5.61370243535524 | 4.28599888869418  | 2.44360052941642  | o |
| -4.13622510163673 | 4.75728278924792  | 1.45380112134327  | h |
| -5.62530891923621 | 2.50588424637610  | 1.98178097052877  | h |
| -5.93708161276863 | -4.57748175845453 | -1.44708302682817 | o |
| -5.89812961169269 | -2.80075236135363 | -0.97140041996528 | h |
| -4.20401936784576 | -4.96955910415326 | -0.97170848688278 | h |
| 2.76648760411793  | -6.35011406452659 | 2.43526541462638  | o |
| 3.56929343686429  | -5.02460641977926 | 1.44364316293297  | h |
| 1.03255514373480  | -5.94630570096419 | 1.97403319113987  | h |
| 2.15183207752079  | 7.12747935519878  | 0.91379419767335  | o |
| 3.09999157988450  | 5.69898482818426  | 0.24816314182899  | h |
| 0.47606176244313  | 6.45878910139965  | 0.55520373211908  | h |

Send

## 2. Additional Explanations

### 2.1 Imaginary frequency for [UO<sub>2</sub>(H<sub>2</sub>O)<sub>3</sub>F<sub>2</sub>](H<sub>2</sub>O)<sub>4</sub>

For [UO<sub>2</sub>(H<sub>2</sub>O)<sub>3</sub>F<sub>2</sub>](H<sub>2</sub>O)<sub>4</sub> a single imaginary value of 7.52i cm<sup>-1</sup> appeared in the numerical evaluation of the vibrational frequencies at the MP2 level when COSMO was included to model the aqueous solution. This is most likely an artefact due to the combination of COSMO and numerical frequency evaluation, which in this case also could not be avoided by changing various computational parameters as suggested in the Turbomole manual. The problem does not appear at the MP2 level for the gasphase, i.e. without COSMO, and also not at the DFT level with and without COSMO. The imaginary frequency mainly corresponds to the simultaneous stretching of two F...H<sub>2</sub>O hydrogen bridges connecting the first and second coordination sphere. The symmetric and antisymmetric O=U=O stretching frequencies were found to be 850 and 927 cm<sup>-1</sup>,

respectively, in comparison to values of 848 and 927  $\text{cm}^{-1}$  for  $[\text{UO}_2(\text{H}_2\text{O})_3\text{F}_2](\text{H}_2\text{O})_3$  where one water molecule less is treated explicitly in the second hydration sphere and no imaginary frequency resulted.

## 2.2 Addition of water molecules

Initially it was attempted to add water molecules one at a time to the  $\text{UO}_2\text{F}_n^{2-n}$  complexes and to build up the first (F,  $\text{H}_2\text{O}$ ) and then the second ( $\text{H}_2\text{O}$ ) coordination sphere systematically by searching for the minimum energy structure for each case, before adding to this the next water molecule. Two problems made this strategy impracticable and led to the prescription described in the main text:

- 1) There are in most cases multiple possibilities to add a single water molecule and the necessary search for the minimum energy structure requires often several lengthy geometry optimizations, all but one of them finally related to a “dead end”.
- 2) It is quite often not possible to first construct the first coordination sphere, and after completion of this task the second. Even for a small number of  $\text{F}^-$  ligands the added water molecules prefer to go to the second coordination sphere where they can form hydrogen bridges with the  $\text{F}^-$  ligand(s). In a certain way this spoils a systematic construction strategy and moreover it leads to too numerous possibilities to add the next water molecule (first or second coordination sphere?).

## 2.3 Structure of $\text{UO}_2(\text{H}_2\text{O})\text{F}_4^{2-}$ complex

The construction of a  $\text{UO}_2^{2+}$  complex with four  $\text{F}^-$  ligands and one  $\text{H}_2\text{O}$  ligand in the first coordination sphere was attempted. Addition of up to totally six water molecules was investigated. In all cases, independent from the starting geometry, the structure optimizations led to (local/global) minimum structures where all water molecules are located in the second coordination sphere, i.e., despite the “smallness” of the  $\text{F}^-$  ligand a direct coordination of the water O to U was not observed. Table S7 summarizes selected results for the addition of the first water molecule.

**Table S7.** Selected def2-TZVPP U SPP results for  $\text{UO}_2\text{F}_4^{2-}$  and  $\text{UO}_2\text{F}_4^{2-} + \text{H}_2\text{O}$

|                                | -E(a.u.)    | R(U=O) | R(U-O) | R(U-F) | R(F...H) | $\nu(\text{cm}^{-1})$ |
|--------------------------------|-------------|--------|--------|--------|----------|-----------------------|
| $[\text{UO}_2\text{F}_4]^{2-}$ |             |        |        |        |          |                       |
| MP2,COSMO                      | 1026.665953 | 1.817  | -      | 2.201  | -        | 794.94<br>851.71      |
| MP2,gasphase                   | 1026.352958 | 1.823  | -      | 2.219  | -        | 781.97<br>868.95      |
| BP86,COSMO                     | 1027.988069 | 1.848  | -      | 2.197  | -        | 742.34<br>770.03      |

|               |             |       |   |       |   |                  |
|---------------|-------------|-------|---|-------|---|------------------|
| BP86,gasphase | 1027.675010 | 1.848 | - | 2.222 | - | 742.09<br>801.81 |
|---------------|-------------|-------|---|-------|---|------------------|

**Formation of  $[\text{UO}_2\text{F}_4(\text{H}_2\text{O})]^{2-}$  attempted, but  $[\text{UO}_2\text{F}_4](\text{H}_2\text{O})^{2-}$  resulted from all optimizations.**

|               |             |       |       |       |       |                  |
|---------------|-------------|-------|-------|-------|-------|------------------|
| MP2,COSMO     | 1102.736188 | 1.811 | 3.865 | 2.190 | 1.827 | 801.92<br>862.9  |
| MP2,gasphase  | 1104.476846 | 1.815 | 3.939 | 2.202 | 1.815 | 793.59<br>886.32 |
| BP86,COSMO    | 1104.476846 | 1.840 | 3.923 | 2.187 | 1.866 | 751.52<br>783.4  |
| BP86,gasphase | 1104.181942 | 1.838 | 3.972 | 2.204 | 1.842 | 755.60<br>822.2  |

The listed distances partly refer to averages and are just meant to get a rough impression of the structure. In case of R(U-F) the two values refer to F atoms without (shorter) and with (longer) hydrogen bonds to water.
